# Supplementary material for: Integrative Analysis of the Transcriptome and Metabolome Reveals the Mechanism of Chinese Fir Seed Germination
Source: MDPI journal article supplement (doi:10.3390/f14040676), 2023-03-24
Supplement: s1 [file s1]

**Supplementary Table S1 The RNA-seq information of samples**

| Samples | Clean reads | Raw reads     | GC Content(%) | Q30(%) | Q20(%) |
|---------|-------------|---------------|---------------|--------|--------|
| S1-1    | 26,106,241  | 7,795,073,918 | 43.91%        | 94.75% | 98.22% |
| S1-2    | 24,994,294  | 7,471,209,736 | 44.05%        | 94.75% | 98.22% |
| S1-3    | 19,732,995  | 5,901,746,064 | 50.23%        | 93.25% | 97.50% |
| S2-1    | 24,297,537  | 7,261,929,592 | 44.48%        | 94.99% | 98.33% |
| S2-2    | 24,538,852  | 7,328,067,880 | 43.97%        | 94.95% | 98.30% |
| S2-3    | 24,449,078  | 7,303,179,402 | 44.42%        | 94.72% | 98.21% |
| S3-1    | 26,142,023  | 7,802,113,090 | 44.47%        | 94.47% | 98.12% |
| S3-2    | 25,535,308  | 7,627,852,280 | 44.57%        | 94.98% | 98.31% |
| S3-3    | 23,984,043  | 7,160,680,780 | 44.47%        | 94.93% | 98.27% |
| S4-1    | 24,625,010  | 7,356,395,422 | 44.34%        | 94.76% | 98.22% |
| S4-2    | 24,194,907  | 7,229,370,362 | 44.24%        | 94.03% | 97.99% |
| S4-3    | 27,148,833  | 8,111,302,590 | 44.21%        | 94.84% | 98.27% |

**Supplementary Table S2 The primers information of genes in this study**

| Gene ID          | Forward Primer (5'–3')  | Reverse Primer (5'–3')  |
|------------------|-------------------------|-------------------------|
| c186613.graph_c0 | ACCTTCACATTTCTCCAC      | TGCTTCAGGGTATGCTCAG     |
| c237436.graph_c0 | CAGCATCTGTAGTTCGTCC     | CTAATGGTGGCACATCCCT     |
| c193003.graph_c0 | GTGCCTTGTGATACATTTGG    | CCCCTTTACTTGTGTCTTG     |
| c205540.graph_c0 | AATCTGGTCTTCCCGCTAC     | ACCTTCCATCAACAACCTC     |
| c218337.graph_c0 | ACTGTGCCATAGAGCCTGTC    | AGTGGGCAACTGAGCGAAT     |
| c222258.graph_c1 | GTAATGGATTGGGGCGTAA     | AACACCCTGATCTTGATGC     |
| NsActin          | GCAAAGACCTCTACGCCAACACG | CTTGATCTTCATCGTGCTGGGTG |
